# Supplementary material
Source: MDPI journal article supplement (https://www.mdpi.com/1424-2818/15/1/1)
Supplement: s1 [file s1]

**Table S1.** The degree of Syringophilidae examination for each Psittaciformes family

|               |                         | No. of species | Examined | Infested (no. of species infested) | Quill mites genus associated with Psittaciformes species |                   |                       |                             |                       |                        |                  |                    |
|---------------|-------------------------|----------------|----------|------------------------------------|----------------------------------------------------------|-------------------|-----------------------|-----------------------------|-----------------------|------------------------|------------------|--------------------|
|               |                         |                |          |                                    | <i>Megasyringophilus</i>                                 | <i>Neoaulobia</i> | <i>Peristerophila</i> | <i>Terratosyringophilus</i> | <i>Psittaciphilus</i> | <i>Lawrencipicobia</i> | <i>Pipicobia</i> | <i>Rafapicobia</i> |
| Strigopidae   | <i>Nestor</i>           | 3              | 2        | 33.3% (1)                          |                                                          |                   | <b>1</b>              |                             |                       |                        |                  |                    |
|               | <i>Strigops</i>         | 1              | 1        | –                                  |                                                          |                   |                       |                             |                       |                        |                  |                    |
| Cacatuidae    | <i>Cacatua</i>          | 11             | 5        | 27.3% (3)                          | <b>1</b>                                                 | <b>1</b>          |                       |                             |                       | <b>1</b>               |                  |                    |
|               | <i>Callocephalon</i>    | 1              | 1        | –                                  |                                                          |                   |                       |                             |                       |                        |                  |                    |
|               | <i>Calyptrorhynchus</i> | 5              | 3        | 40% (2)                            |                                                          | <b>1</b>          |                       |                             |                       | <b>1</b>               |                  |                    |
|               | <i>Eolophus</i>         | 1              | 1        | –                                  |                                                          |                   |                       |                             |                       |                        |                  |                    |
|               | <i>Lophochroa</i>       | 1              | 0        | –                                  |                                                          |                   |                       |                             |                       |                        |                  |                    |
|               | <i>Nymphicus</i>        | 1              | 1        | –                                  |                                                          |                   |                       |                             |                       |                        |                  |                    |
|               | <i>Probosciger</i>      | 1              | 1        | 100% (1)                           |                                                          | <b>1</b>          |                       |                             |                       |                        |                  |                    |
| Psittaculidae | <i>Agapornis</i>        | 9              | 8        | 55.6% (5)                          |                                                          | <b>5</b>          |                       |                             |                       |                        |                  |                    |
|               | <i>Alisterus</i>        | 3              | 3        | –                                  |                                                          |                   |                       |                             |                       |                        |                  |                    |
|               | <i>Aprornictus</i>      | 2              | 2        | –                                  |                                                          |                   |                       |                             |                       |                        |                  |                    |
|               | <i>Barnardius</i>       | 1              | 1        | –                                  |                                                          |                   |                       |                             |                       |                        |                  |                    |
|               | <i>Bolbopsittacus</i>   | 1              | 1        | –                                  |                                                          |                   |                       |                             |                       |                        |                  |                    |
|               | <i>Chalcopsitta</i>     | 3              | 2        | –                                  |                                                          |                   |                       |                             |                       |                        |                  |                    |
|               | <i>Charminetta</i>      | 1              | 0        | –                                  |                                                          |                   |                       |                             |                       |                        |                  |                    |
|               | <i>Charmosyna</i>       | 2              | 1        | ~                                  |                                                          |                   |                       |                             |                       |                        |                  |                    |
|               | <i>Charmosynoides</i>   | 1              | 0        | –                                  |                                                          |                   |                       |                             |                       |                        |                  |                    |
|               | <i>Charmosynopsis</i>   | 2              | 0        | –                                  |                                                          |                   |                       |                             |                       |                        |                  |                    |
|               | <i>Coracopsis</i>       | 3              | 2        | –                                  |                                                          |                   |                       |                             |                       |                        |                  |                    |

|  |                          |    |   |           |          |          |  |          |  |          |          |  |
|--|--------------------------|----|---|-----------|----------|----------|--|----------|--|----------|----------|--|
|  | <i>Cyanoramphus</i>      | 10 | 3 | 33.3% (1) |          |          |  |          |  |          | <b>1</b> |  |
|  | <i>Cyclopsitta</i>       | 2  | 1 | 50% (1)   |          |          |  |          |  |          | <b>1</b> |  |
|  | <i>Eclectus</i>          | 2  | 1 | 50% (1)   |          |          |  |          |  | <b>1</b> |          |  |
|  | <i>Eos</i>               | 6  | 2 | 16.7% (1) | <b>1</b> |          |  |          |  |          |          |  |
|  | <i>Eunymphicus</i>       | 2  | 0 | –         |          |          |  |          |  |          |          |  |
|  | <i>Geoffroyus</i>        | 3  | 3 | 33.3% (1) | <b>1</b> |          |  |          |  |          |          |  |
|  | <i>Glossopsitta</i>      | 2  | 1 | –         |          |          |  |          |  |          |          |  |
|  | <i>Hypocharmosyna</i>    | 2  | 0 | ~–        |          |          |  |          |  |          |          |  |
|  | <i>Lathamus</i>          | 1  | 0 | –         |          |          |  |          |  |          |          |  |
|  | <i>Lophopsittacus</i>    | 2  | 0 | –         |          |          |  |          |  |          |          |  |
|  | <i>Loriculus</i>         | 14 | 7 | 28% (2)   |          | <b>2</b> |  |          |  |          |          |  |
|  | <i>Lorius</i>            | 6  | 4 | 33.3% (2) |          |          |  | <b>2</b> |  |          |          |  |
|  | <i>Mascarinus</i>        | 1  | 0 | –         |          |          |  |          |  |          |          |  |
|  | <i>Melopsittacus</i>     | 1  | 1 | –         |          |          |  |          |  |          |          |  |
|  | <i>Micropsitta</i>       | 6  | 3 | –         |          |          |  |          |  |          |          |  |
|  | <i>Necropsittacus</i>    | 1  | 0 | –         |          |          |  |          |  |          |          |  |
|  | <i>Neophema</i>          | 7  | 3 | –         |          |          |  |          |  |          |          |  |
|  | <i>Neopsittacus</i>      | 2  | 0 | –         |          |          |  |          |  |          |          |  |
|  | <i>Northiella</i>        | 2  | 0 | –         |          |          |  |          |  |          |          |  |
|  | <i>Oreopsittacus</i>     | 1  | 0 | –         |          |          |  |          |  |          |          |  |
|  | <i>Parvipsitta</i>       | 2  | 2 | 100% (2)  |          |          |  |          |  |          | <b>2</b> |  |
|  | <i>Pezoporus</i>         | 2  | 1 | –         |          |          |  |          |  |          |          |  |
|  | <i>Platycercus</i>       | 6  | 4 | 16.7% (1) | <b>1</b> | <b>1</b> |  |          |  |          |          |  |
|  | <i>Polytelis</i>         | 3  | 1 | –         |          |          |  |          |  |          |          |  |
|  | <i>Prioniturus</i>       | 10 | 3 | –         |          |          |  |          |  |          |          |  |
|  | <i>Prosopeia</i>         | 3  | 0 | –         |          |          |  |          |  |          |          |  |
|  | <i>Psephotus</i>         | 5  | 2 |           |          |          |  |          |  |          |          |  |
|  | <i>Pseudeos</i>          | 1  | 1 | 100% (1)  |          | <b>1</b> |  |          |  |          | <b>1</b> |  |
|  | <i>Psittacella</i>       | 4  | 0 | –         |          |          |  |          |  |          |          |  |
|  | <i>Psittacula</i>        | 15 | 6 | 20% (3)   | <b>3</b> | <b>1</b> |  |          |  |          |          |  |
|  | <i>Psittaculirostris</i> | 3  | 1 | –         |          |          |  |          |  |          |          |  |
|  | <i>Psitteuteles</i>      | 1  | 1 | –         |          |          |  |          |  |          |          |  |

|             |                         |    |   |           |          |          |          |          |          |          |          |          |
|-------------|-------------------------|----|---|-----------|----------|----------|----------|----------|----------|----------|----------|----------|
|             | <i>Psittinus</i>        | 1  | 1 |           |          |          |          |          |          |          |          |          |
|             | <i>Psittirichas</i>     | 1  | 1 | –         |          |          |          |          |          |          |          |          |
|             | <i>Purpureicephalus</i> | 1  | 0 | –         |          |          |          |          |          |          |          |          |
|             | <i>Saudareos</i>        | 5  | 2 | 20% (1)   | <b>1</b> |          |          |          |          |          |          |          |
|             | <i>Synorhacma</i>       | 1  | 0 | –         |          |          |          |          |          |          |          |          |
|             | <i>Tanygnathus</i>      | 4  | 3 | –         |          |          |          |          |          |          |          |          |
|             | <i>Trichoglossus</i>    | 9  | 4 | 44.4% (4) | <b>3</b> |          | <b>1</b> | <b>1</b> |          |          |          |          |
|             | <i>Vini</i>             | 11 | 2 | 9.1% (1)  |          |          |          |          |          |          | <b>1</b> |          |
| Psittacidae | <i>Alipiopsittaca</i>   | 1  | 1 | –         |          |          |          |          |          |          |          |          |
|             | <i>Amazona</i>          | 32 | 9 | 12.5% (4) |          | <b>2</b> |          |          | <b>3</b> |          |          |          |
|             | <i>Anodorhynchus</i>    | 3  | 0 | –         |          |          |          |          |          |          |          |          |
|             | <i>Ara</i>              | 9  | 3 | 22.2% (2) |          | <b>1</b> |          |          |          | <b>1</b> |          |          |
|             | <i>Aratinga</i>         | 6  | 5 | 16.7% (1) | <b>1</b> | <b>1</b> |          |          |          |          |          |          |
|             | <i>Bolborhynchus</i>    | 3  | 2 | 33.3% (1) |          |          |          |          |          |          |          | <b>1</b> |
|             | <i>Brotogeris</i>       | 8  | 7 | 50% (4)   | <b>1</b> |          | <b>1</b> |          |          |          |          | <b>4</b> |
|             | <i>Canuropsis</i>       | 1  | 0 | –         |          |          |          |          |          |          |          |          |
|             | <i>Cyanoliseus</i>      | 1  | 1 | 100% (1)  |          | <b>1</b> |          |          |          |          |          | <b>1</b> |
|             | <i>Cyanopsitta</i>      | 1  | 1 | –         |          |          |          |          |          |          |          |          |
|             | <i>Deropytus</i>        | 1  | 1 | –         |          |          |          |          |          |          |          |          |
|             | <i>Diopsittaca</i>      | 1  | 1 | 100% (1)  |          |          |          |          |          |          |          | <b>1</b> |
|             | <i>Enicognathus</i>     | 2  | 1 | 50% (1)   |          |          |          |          |          |          |          | <b>1</b> |
|             | <i>Eupsittula</i>       | 5  | 4 | 60% (3)   | <b>2</b> | <b>2</b> |          |          |          |          |          | <b>2</b> |
|             | <i>Forpus</i>           | 9  | 4 | 22.2% (2) |          |          |          |          |          | <b>1</b> |          | <b>1</b> |
|             | <i>Graydidascalus</i>   | 1  | 1 | –         |          |          |          |          |          |          |          |          |
|             | <i>Guaruba</i>          | 1  | 1 | –         |          |          |          |          |          |          |          |          |
|             | <i>Hapalopsittaca</i>   | 4  | 1 | –         |          |          |          |          |          |          |          |          |
|             | <i>Leptosittaca</i>     | 1  | 0 | –         |          |          |          |          |          |          |          |          |
|             | <i>Myiopsitta</i>       | 1  | 1 | 100% (1)  |          |          |          |          |          |          |          | <b>1</b> |
|             | <i>Nannopsittaca</i>    | 2  | 1 | –         |          |          |          |          |          |          |          |          |
|             | <i>Ognorhynchus</i>     | 1  | 0 | –         |          |          |          |          |          |          |          |          |
|             | <i>Orthopsittaca</i>    | 1  | 1 | –         |          |          |          |          |          |          |          |          |
|             | <i>Pionites</i>         | 2  | 2 | 100% (2)  |          |          |          |          |          | <b>2</b> |          |          |

|  |                      |    |    |           |          |          |  |          |  |          |  |          |
|--|----------------------|----|----|-----------|----------|----------|--|----------|--|----------|--|----------|
|  | <i>Pionopsitta</i>   | 1  | 1  | 100% (1)  |          |          |  |          |  |          |  | <b>1</b> |
|  | <i>Pionus</i>        | 7  | 7  | 14.3% (1) |          |          |  | <b>1</b> |  |          |  |          |
|  | <i>Poicephalus</i>   | 10 | 9  | 70% (7)   |          | <b>1</b> |  |          |  | <b>7</b> |  |          |
|  | <i>Primolius</i>     | 3  | 2  | –         |          |          |  |          |  |          |  |          |
|  | <i>Psilopsiagon</i>  | 2  | 2  | 100% (2)  |          |          |  |          |  |          |  | <b>2</b> |
|  | <i>Psittacara</i>    | 12 | 3  | 8.3% (1)  |          |          |  |          |  |          |  | <b>1</b> |
|  | <i>Psittacus</i>     | 1  | 1  | –         |          |          |  |          |  |          |  |          |
|  | <i>Pyrilia</i>       | 7  | 5  | –         |          |          |  |          |  |          |  |          |
|  | <i>Pyrrhura</i>      | 23 | 18 | 17.4% (4) |          |          |  |          |  | <b>1</b> |  | <b>4</b> |
|  | <i>Rhynchopsitta</i> | 2  | 1  | 50% (1)   | <b>1</b> |          |  |          |  |          |  |          |
|  | <i>Thectocercus</i>  | 1  | 1  | 100% (1)  |          |          |  |          |  |          |  | <b>1</b> |
|  | <i>Touit</i>         | 8  | 3  | 25% (2)   |          |          |  |          |  | <b>1</b> |  | <b>1</b> |
|  | <i>Triclaria</i>     | 1  | 1  | –         |          |          |  |          |  |          |  |          |
